# Supplementary material for: Dissociative photodetachment of H3O2−: a full-dimensional quantum dynamics study
Source: Royal Society of Chemistry journal article supplement (doi:10.1039/d1cp03495b), 2021-01-01
Supplement: d1cp03495b1.pdf [file d1cp03495b1.pdf]

## Supporting Information for

### Dissociative photodetachment of $\text{H}_3\text{O}_2^-$ : a full-dimensional quantum dynamics study

Hongwei Song,<sup>1,\*</sup> Yongfa Zhu,<sup>1</sup> Mengyi Pan<sup>1,2</sup>, and Minghui Yang<sup>1,3</sup>

<sup>1</sup>State Key Laboratory of Magnetic Resonance and Atomic and Molecular Physics,  
Wuhan Institute of Physics and Mathematics, Innovation Academy for Precision  
Measurement Science and Technology, Chinese Academy of Sciences, Wuhan  
430071, China

<sup>2</sup>College of Physical Science and Technology, Huazhong Normal University,  
Wuhan 430079, China

<sup>3</sup>Wuhan National Laboratory for Optoelectronics, Huazhong University of Science  
and Technology, Wuhan 430071, China

\*: Corresponding author: [hwsong@wipm.ac.cn](mailto:hwsong@wipm.ac.cn)

## SI. Anion potential energy surface

The *ab initio* method, the sampling scheme, and the fitting (or interpolation) tool are the pivotal factors in developing accurate PES. To keep consistent with the neutral PES, the *ab initio* method employed here is the same as for the neutral PES, *i.e.* the energies of all sampled points are calculated at the level of FC-UCCSD(T)-F12a/aug-cc-pVTZ,<sup>1-2</sup> implemented by the software MOLPRO 2012. 1.<sup>3</sup> FC denotes “frozen-core” treatment in the post-Hartree–Fock calculations.

The sampling scheme is as follows: the Atom Centered Density Matrix Propagation molecular dynamics is first performed by Gaussian 09, Revision E.01<sup>4</sup> at the level of B3LYP/6-311G\* to sample the first batch of data points. A raw PES is then generated by fitting these data points. Batches of quasiclassical trajectories are then launched on the raw PES from different initial conditions. New points whose geometries are not close to the existing data set are added to the data set to patch up the unphysical regions of the PES. The closeness between two points  $\{\vec{r}_i\}$  and  $\{\vec{r}'_i\}$  is

judged by the Euclidean distance, which is defined as  $\chi = \sqrt{\sum_{i=1}^{10} |\vec{r}_i - \vec{r}'_i|^2}$ . The

permutationally equivalent points are also included in such a screening. The points that satisfy  $\chi > 0.1 \text{ \AA}$  are retained in the data set and finally a total of 35222 points are sampled by repeating the procedure dozens of times.

The fundamental-invariant neural network (FI-NN) method is applied in the fitting.<sup>5</sup> The permutation invariance of the fitted PES with respect to identical atoms is enforced by using fundamental invariants as the input vector of the neural network.<sup>6-7</sup> The Morse-like variables,  $P_{ij} = \exp\left(\frac{r_{ij}}{\alpha}\right) \exp\left(-\frac{r_{ij}}{\alpha}\right)$ , are used to construct the monomials with  $\alpha$  as an adjustable parameters ( $\alpha = 2.0 \text{ \AA}$  in this work), in which  $r_{ij}$  is the internuclear

distance between the  $i$ th and  $j$ th atoms. The architecture of the NN is the same as that used for the neutral PES, *i.e.* 26-30-70-1, which contains 26 invariant polynomials in the input layer, 30 and 70 neurons in the two hidden layers, and 1 potential energy in the output layers, with a total of 3051 parameters. The training data is fitted by the backward propagation neural network with the Levenberg–Marquardt algorithm.<sup>8</sup> The “early stopping” method is used to avoid overfitting.<sup>9</sup> The root mean square error

(RMSE), defined as 
$$RMSE = \sqrt{\sum_{i=1}^{N_{data}} (E_{fit} - E_{ab\ initio})^2 / N_{data}}$$
, is used to assess the quality of

each fitting. The data set is randomly divided into two groups, 95% of the points as the training set and the rest 5% as the validating set. To avoid false extrapolation, only fits with a similar RMSE for both sets are reasonable. Finally, the so-called ensemble approach is implemented to minimize random errors.<sup>10</sup> The final PES by averaging three best fits has an overall RMSE of 0.758 meV.

Figure S1 show the potential energy curves of  $\text{H}_3\text{O}_2^-$  along the central hydrogen atom transfer coordinate and the hindered rotor coordinate. The fitted values reproduce well *ab initio* calculations for both curves. There exists a  $C_2$ -saddle point along the minimum energy path, which separates two asymmetric, minimum equilibrium structures. The global minimum structure has a  $C_1$  symmetry with the bridging hydrogen slightly closer to one of the two oxygen atoms. The torsional potential of the two OH groups is presented on the lower panel, for which the bridging hydrogen is in the middle of the two oxygen atoms and the two OH fragments rotate along the O-H-O axis. The torsional motion is somewhat floppy, with the ‘TS’ barrier flanked by two second order saddle points, ‘cis’ and ‘trans’ barriers.

The optimized geometries of stationary points for  $\text{H}_3\text{O}_2^-$  at the level of FC-UCCSD(T)-F12a/aug-cc-pVTZ and on the fitted PES are list in Table S1. The

optimized geometries on the fitted PES are in good consistent with *ab initio* calculations. The bond lengths differ by less than 0.001 Å, and the angles differ by less than 0.2°. The energies and harmonic frequencies of the stationary points are given in Table S2. The fitted energies agree well with the *ab initio* values. The frequency difference is less than 10 cm<sup>-1</sup>.

**Table S1.** Geometries (bond length in angstrom and angle in degree) of the stationary points for  $\text{H}_3\text{O}_2^-$ . The corresponding atom labels are shown in Figure S1.

| Species              | Method                 | $R_{\text{O1H2}}$ | $R_{\text{O1H3}}$ | $R_{\text{H2O4}}$ | $R_{\text{O4H5}}$ | $\theta_{\text{H2O1H3}}$ | $\theta_{\text{O1H2O4}}$ | $\theta_{\text{H2O4H5}}$ | $\Phi_{\text{O4H5H2O1}}$ | $\Phi_{\text{O1H3H2O4}}$ |
|----------------------|------------------------|-------------------|-------------------|-------------------|-------------------|--------------------------|--------------------------|--------------------------|--------------------------|--------------------------|
| $\text{H}_2\text{O}$ | ab initio <sup>a</sup> | 0.959             | 0.959             |                   |                   | 104.45                   |                          |                          |                          |                          |
|                      | PES <sup>b</sup>       | 0.959             | 0.959             |                   |                   | 104.26                   |                          |                          |                          |                          |
| $\text{OH}^-$        | ab initio <sup>a</sup> |                   |                   |                   | 0.965             |                          |                          |                          |                          |                          |
|                      | PES <sup>b</sup>       |                   |                   |                   | 0.965             |                          |                          |                          |                          |                          |
| TS                   | ab initio <sup>a</sup> | 1.218             | 0.960             | 1.218             | 0.960             | 103.35                   | 179.36                   | 103.36                   | 179.10                   | 179.11                   |
|                      | PES <sup>b</sup>       | 1.218             | 0.960             | 1.218             | 0.960             | 103.36                   | 179.36                   | 103.35                   | 179.10                   | 179.11                   |
| $\text{GM}^-$        | ab initio <sup>a</sup> | 1.084             | 0.959             | 1.407             | 0.961             | 101.97                   | 177.05                   | 105.56                   | 174.29                   | -178.88                  |
|                      | PES <sup>b</sup>       | 1.084             | 0.959             | 1.407             | 0.961             | 101.97                   | 177.05                   | 105.56                   | 174.29                   | -178.89                  |
| trans-TS             | ab initio <sup>a</sup> | 1.219             | 0.960             | 1.219             | 0.960             | 104.00                   | 180.00                   | 104.01                   | -180.00                  | -180.00                  |
|                      | PES <sup>b</sup>       | 1.219             | 0.960             | 1.219             | 0.960             | 104.00                   | 179.99                   | 104.01                   | -180.00                  | -180.00                  |
| cis-TS               | ab initio <sup>a</sup> | 1.220             | 0.960             | 1.220             | 0.960             | 104.48                   | 178.84                   | 104.49                   | 179.96                   | 180.00                   |
|                      | PES <sup>b</sup>       | 1.220             | 0.960             | 1.220             | 0.960             | 104.48                   | 178.85                   | 104.49                   | 179.96                   | 179.99                   |

<sup>a</sup>UCCSD(T)-F12/aug-cc-pVTZ by Molpro 2012.

<sup>b</sup>FI-NN PES.

**Table S2.** Energies (in eV) and harmonic frequencies (in  $\text{cm}^{-1}$ ) of the stationary points for  $\text{H}_3\text{O}_2^-$ .

| Species                          | Method                 | E (eV) | Frequency ( $\text{cm}^{-1}$ ) |      |      |      |      |     |     |      |      |
|----------------------------------|------------------------|--------|--------------------------------|------|------|------|------|-----|-----|------|------|
|                                  |                        |        | 1                              | 2    | 3    | 4    | 5    | 6   | 7   | 8    | 9    |
| $\text{H}_2\text{O}+\text{OH}^-$ | Ab initio <sup>a</sup> | 1.1830 | 3942                           | 3832 | 3749 | 1646 |      |     |     |      |      |
|                                  | PES <sup>b</sup>       | 1.1761 | 3940                           | 3825 | 3742 | 1648 |      |     |     |      |      |
| TS<br>( $C_2$ )                  | Ab initio <sup>a</sup> | 0.0110 | 3838                           | 3837 | 1618 | 1517 | 632  | 573 | 570 | 210  | 682i |
|                                  | PES <sup>b</sup>       | 0.0110 | 3838                           | 3835 | 1618 | 1517 | 632  | 573 | 569 | 210  | 680i |
| GM<br>( $C_1$ )                  | Ab initio <sup>a</sup> | 0.0000 | 3865                           | 3811 | 1746 | 1617 | 1343 | 580 | 471 | 327  | 201  |
|                                  | PES <sup>b</sup>       | 0.0000 | 3864                           | 3811 | 1748 | 1619 | 1342 | 580 | 470 | 327  | 201  |
| trans-TS<br>( $C_{2h}$ )         | Ab initio <sup>a</sup> | 0.0330 | 3842                           | 3838 | 1792 | 1255 | 737  | 605 | 496 | 187i | 702i |
|                                  | PES <sup>b</sup>       | 0.0329 | 3840                           | 3837 | 1790 | 1258 | 737  | 606 | 495 | 187i | 700i |
| cis-TS<br>( $C_{2v}$ )           | Ab initio <sup>a</sup> | 0.0609 | 3836                           | 3833 | 1787 | 1253 | 751  | 612 | 500 | 236i | 744i |
|                                  | PES <sup>b</sup>       | 0.0608 | 3841                           | 3834 | 1786 | 1256 | 750  | 612 | 501 | 239i | 741i |

<sup>a</sup>UCCSD(T)-F12/aug-cc-pVTZ by Molpro 2012.

<sup>b</sup>FI-NN PES.

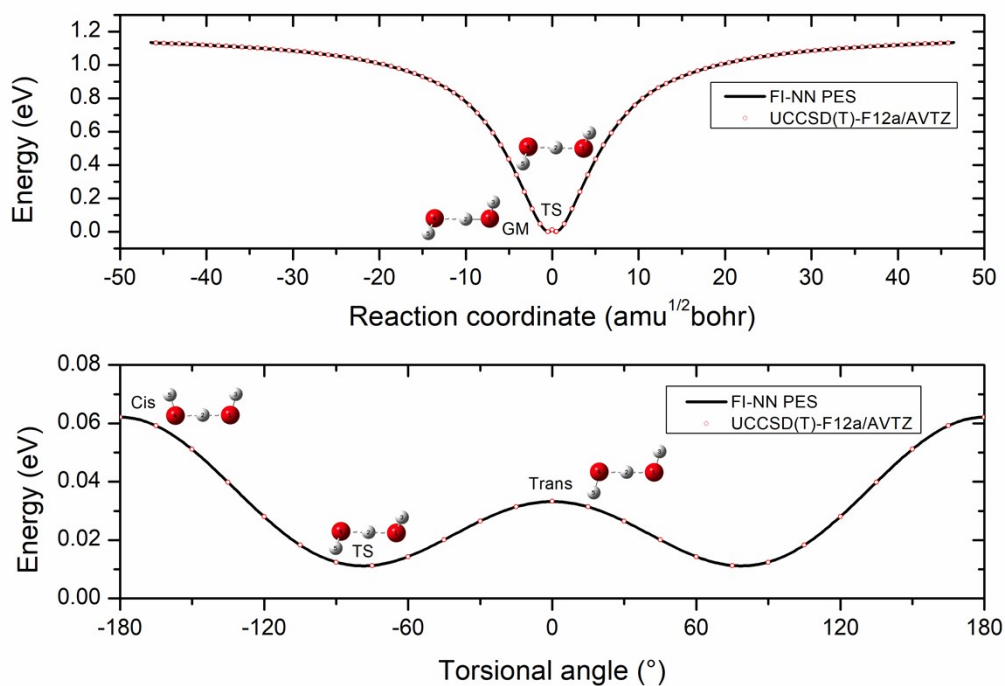

Figure S1: Potential energy curves for the anion  $\text{H}_3\text{O}_2^-$  along the central hydrogen atom transfer coordinate in the upper panel and the hindered rotor coordinate in the lower panel. The other coordinates are fixed at the TS geometry in the lower panel. All energies are given in  $\text{kcal mol}^{-1}$  and relative to the global minimum.

## References:

1. T. B. Adler, G. Knizia and H.-J. Werner *J. Chem. Phys.* 2007, *127*, 221106.
2. G. Knizia, T. B. Adler and H.-J. Werner *J. Chem. Phys.* 2009, *130*, 054104.
3. H.-J. Werner, P. J. Knowles, G. Knizia, F. R. Manby, M. Schütz and others *MOLPRO, version 2012.1*. a package of ab initio programs, 2012, see <http://www.molpro.net>.
4. M. J. Frisch, G. W. Trucks, H. B. Schlegel, G. E. Scuseria, M. A. Robb, J. R. Cheeseman, G. Scalmani, V. Barone, G. A. Petersson, H. Nakatsuji, X. M. Li and others *Gaussian 09, Revision B.01*, . Gaussian, Inc., Wallingford CT, 2009.
5. K. Shao, J. Chen, Z. Zhao and D. H. Zhang *J. Chem. Phys.* 2016, *145*, 071101.
6. Z. Xie and J. M. Bowman *J. Chem. Theory Comput.* 2009, *6*, 26-34.
7. B. Jiang and H. Guo *J. Chem. Phys.* 2013, *139*, 054112.
8. M. T. Hagan and M. B. Menhaj *IEEE Transactions on Neural Networks* 1994, *5*, 989-993.
9. L. M. Raff, R. Komanduri, M. Hagan and S. T. S. Bukkapatnam *Neural Networks in Chemical Reaction Dynamics*. Oxford University Press: Oxford, 2012.
10. Z.-H. Zhou, J. Wu and W. Tang *Artif. Intell.* 2002, *137*, 239-263.
